# Supplementary material for: Computational Investigations on the Binding Mode of Ligands for the Cannabinoid-Activated G Protein-Coupled Receptor GPR18
Source: PubMed Central journal article supplement (PMC7277601; doi:10.3390/biom10050686), 2020-04-29
Supplement: biomolecules-10-00686-s001.pdf [file biomolecules-10-00686-s001.pdf]

# Computational Investigations on the Binding Mode of Ligands for the Cannabinoid-Activated G Protein-Coupled Receptor GPR18

Alexander Neumann,<sup>1,2</sup> Viktor Engel,<sup>1</sup> Andhika B. Mahardhika,<sup>1,2</sup> Clara T. Schoeder,<sup>1,2</sup> Vigneshwaran Namasivayam,<sup>1</sup> Katarzyna Kieć-Kononowicz,<sup>3</sup> and Christa E. Müller<sup>1,2\*</sup>

<sup>1</sup> PharmaCenter Bonn, Pharmaceutical Institute, Pharmaceutical Sciences Bonn (PSB), Pharmaceutical & Medicinal Chemistry, University of Bonn, Bonn 53121, Germany

<sup>2</sup> Research Training Group 1873, University of Bonn, Bonn 53127, Germany

<sup>3</sup> Department of Technology and Biotechnology of Drugs, Faculty of Pharmacy, Jagiellonian University Medical College, Medyczna 9, 30 - 688 Krakow, Poland.

\* Correspondence: christa.mueller@uni-bonn.de; Tel.: +49-228-73-2301. Fax: +49-228-73-2567

## Table of Contents

|                                                                                                                                     |    |
|-------------------------------------------------------------------------------------------------------------------------------------|----|
| Figure S1. Multiple sequence alignment of GPR18 for homology modeling.....                                                          | 2  |
| Figure S2. Time scale of the molecular dynamics simulation of antagonist <b>4</b> .....                                             | 3  |
| Figure S3. Time scale of the molecular dynamics simulation of antagonist <b>5</b> .....                                             | 4  |
| Figure S4. Trajectories of salt bridges.....                                                                                        | 5  |
| Figure S5. Possible interaction of antagonist <b>6</b> with Asn185.....                                                             | 6  |
| Figure S6. Structures of GPR18 imidazothiazinone antagonists .....                                                                  | 7  |
| Figure S7. Structures of GPR18 antagonists with modification of the core structure .....                                            | 8  |
| Figure S8. Comparison of the binding modes of antagonists <b>5</b> and <b>32</b> .....                                              | 9  |
| Figure S9. Multiple sequence alignment of human GPR18 and the cannabinoid receptors CB <sub>1</sub> and CB <sub>2</sub> .....       | 10 |
| Figure S10. Comparison of the binding mode of THC to GPR18 with the binding of THC derivatives to the CB <sub>1</sub> receptor..... | 11 |
| References .....                                                                                                                    | 12 |

|       |     |                                                                |     |
|-------|-----|----------------------------------------------------------------|-----|
| 4xnv  | 1   | TGFQF-YYLPVYILVFIIGFLGNSVAIWMFVFMKPWSGISVYMFNLALADFLYVLTLP     | 59  |
| 5c1m  | 1   | PSMVTAITIMALYSIVCVVGLFGNFLVMYVIVRYTKMKTATNIYIFNLALADALATSTLP   | 60  |
| 5xsz  | 1   | DNFKYPLYSM-VFSIVFMVGLITNVAAMYIFMCSLKLARNETTTYYMNLVVSDDLFLVLTLP | 59  |
| GPR18 | 1   | --DEYKIAALVFYSCIFIIGLGVNITALWVFSCTTKKRRTVTIYMMNVALVDLIFIMTLP   | 58  |
|       |     |                                                                |     |
| 4xnv  | 60  | ALIFYYFNKTDWIFGDAMCKLQRFIFHVNLYGSILFLTICISAHRYSGVVYP-KSLGRLKK  | 118 |
| 5c1m  | 61  | FQSVNYLMGT-WPFGNILCKIVISIDYNNMFTSIFTLCTMSVDRIYVCHPVKALDFRTP    | 119 |
| 5xsz  | 60  | LRVFYFVQQN-WPFGSLLCKLSVSLFYTNMYGSILFLTICISVDRFLAIVYPFRSRGLRTK  | 118 |
| GPR18 | 59  | FRMFYYAKDE-WPFGYFCQILGALTVMFYPSIALWLLAFISADRYMAIVQPKYAKELKNT   | 117 |
|       |     |                                                                |     |
| 4xnv  | 119 | KNAICISVLVWLVVVAISPILFY-SGTGVRKNKTITCYDTTSDEYLRSYFIYSMCTTV-    | 176 |
| 5c1m  | 120 | RNAKIVNVCNWILSSAIGLPVMFM--ATTKYRQGSIDCTLTFSHPTWYWENLLKICVFI-   | 176 |
| 5xsz  | 119 | RNAKIVCAAVWVVLVLSGSLPTGFMLNSTNKLENNISCF-----EWK-SHLSKVVFIE     | 171 |
| GPR18 | 118 | CKAVLACVGVWIMTLTTTTPLLLLYKDPDK-DSTPATCLKISDIYLKAVNVNLNLRLT-    | 175 |
|       |     |                                                                |     |
| 4xnv  | 177 | -AMFCVPLVLILGCYGLIVRALIYKEPL-----RRKSIYLVIIIVLTVFAVSYIPFH      | 226 |
| 5c1m  | 177 | -FAFIMPVLIIITVCYGLMILRLKSVRMLSGSKEKDRNLRRITRMVLVVAVFIVCWTPIH   | 235 |
| 5xsz  | 172 | TVGFLLIPLMLNVVCSAMVLQTLRRPNTVL-----NKKKILRMIIVHLFIFCFPIYN      | 224 |
| GPR18 | 176 | -FFFLIPLFIMIGCYLVIIHNLHGRTSK---LKPVKKEKSIRIITLLVQVLVCFMPPH     | 231 |
|       |     |                                                                |     |
| 4xnv  | 227 | VMKTMNLRARLDFQTPAMCAFNDRVYAT-YQVTRGLASLNSCVNPILYFLAGDTFRRR     | 283 |
| 5c1m  | 236 | I--YVIIKALI---TIP----ETTFQTVSWHFCIALGYTNSCLNPVLYAFLDENFKRC     | 284 |
| 5xsz  | 225 | V--NLVFYSLVRTNTLKGCAAESVVRTI-YPIALCIAVSNCCFDPVYVYFTSETIQNS     | 279 |
| GPR18 | 232 | I--CFAFLMLGT-----GENSYNPWGAFTTFLMNLSTCLDVILYYIVSKQFQAR         | 278 |

**Figure S1.** Multiple sequence alignment of the human GPR18 and the templates chosen for homology modeling.

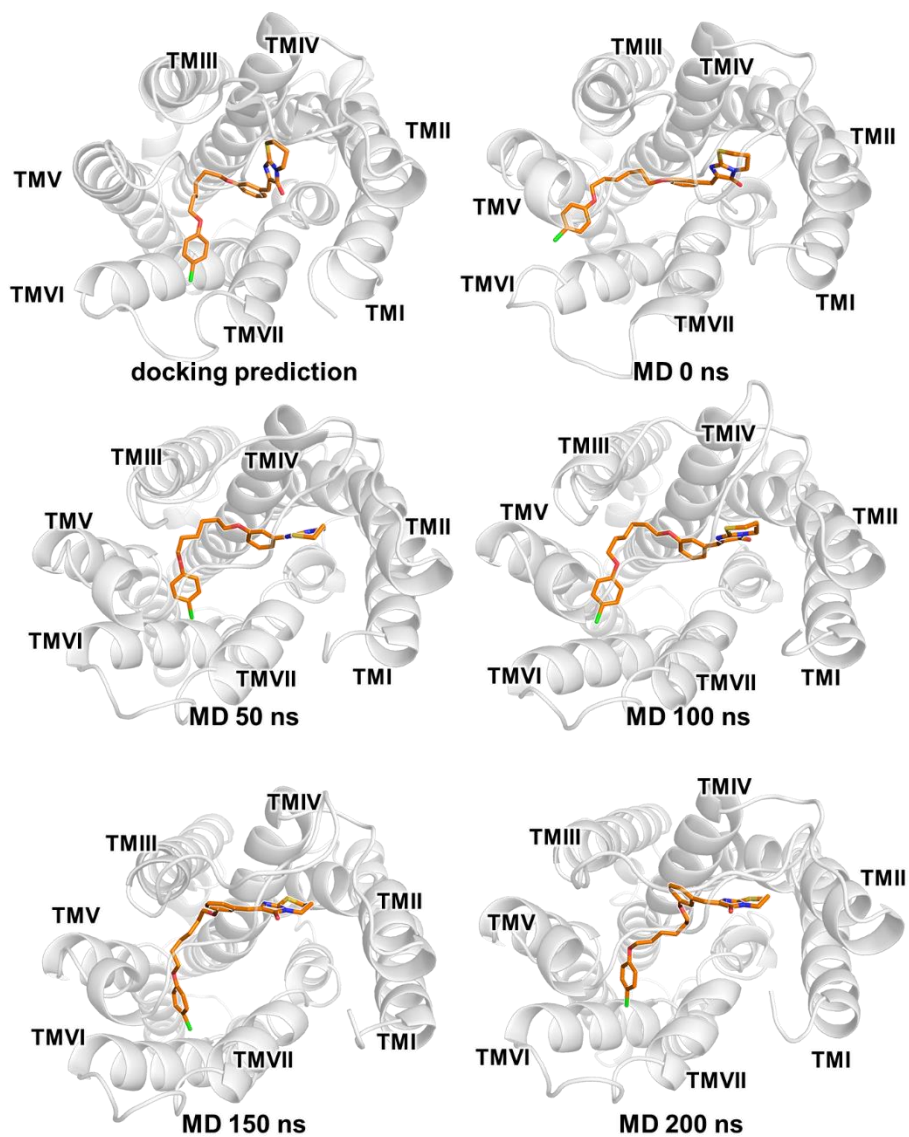

**Figure S2.** Time scale of the molecular dynamics (denoted 'MD') simulation of GPR18 homology model complex with antagonist 4. The docking prediction which was used for the simulation run is shown at the top left corner. 0 ns presents the complex after relaxation steps.

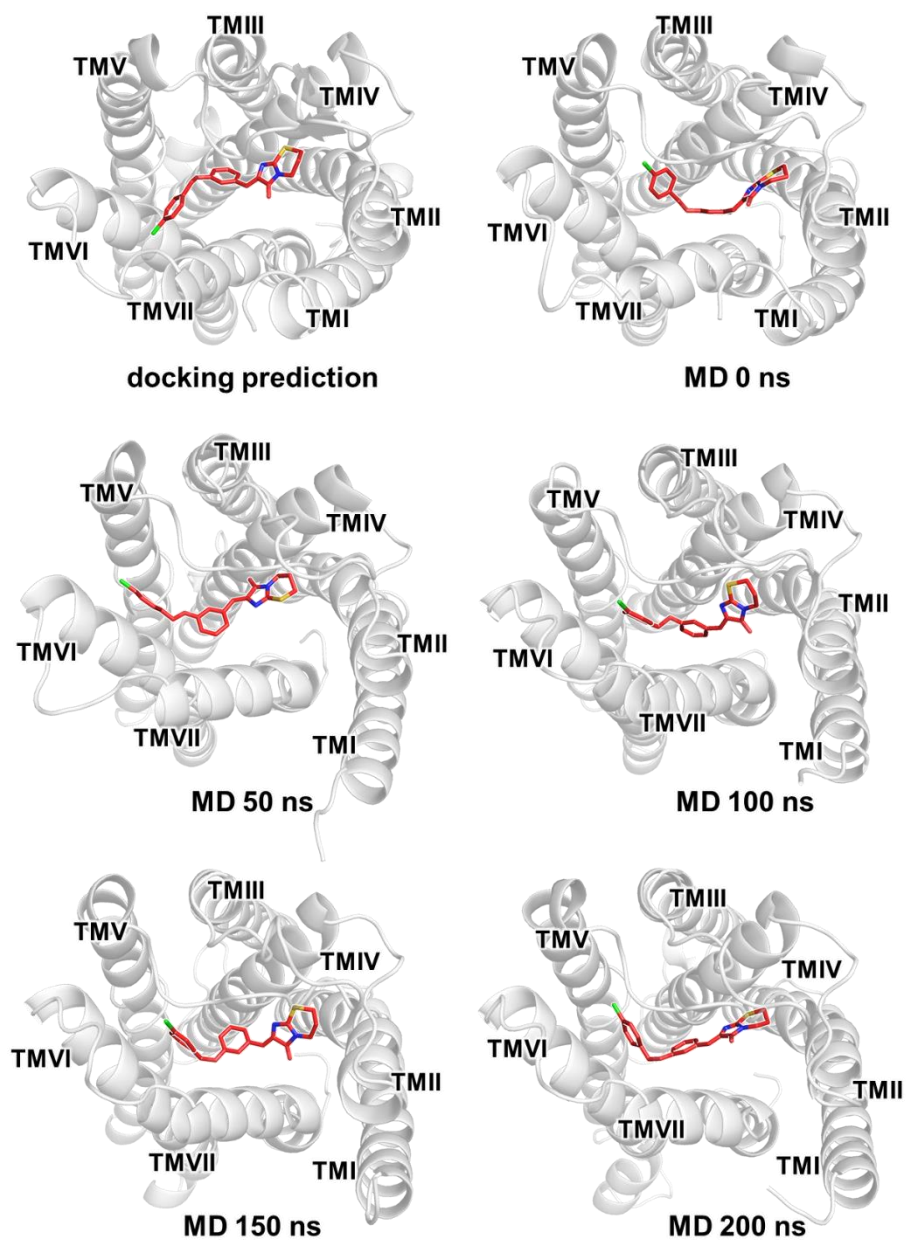

**Figure S3.** Time scale of the molecular dynamics (denoted 'MD') simulation of GPR18 homology model complex with antagonist 5. The docking prediction which was used for the simulation run is shown at the top left corner. 0 ns presents the complex after relaxation steps.

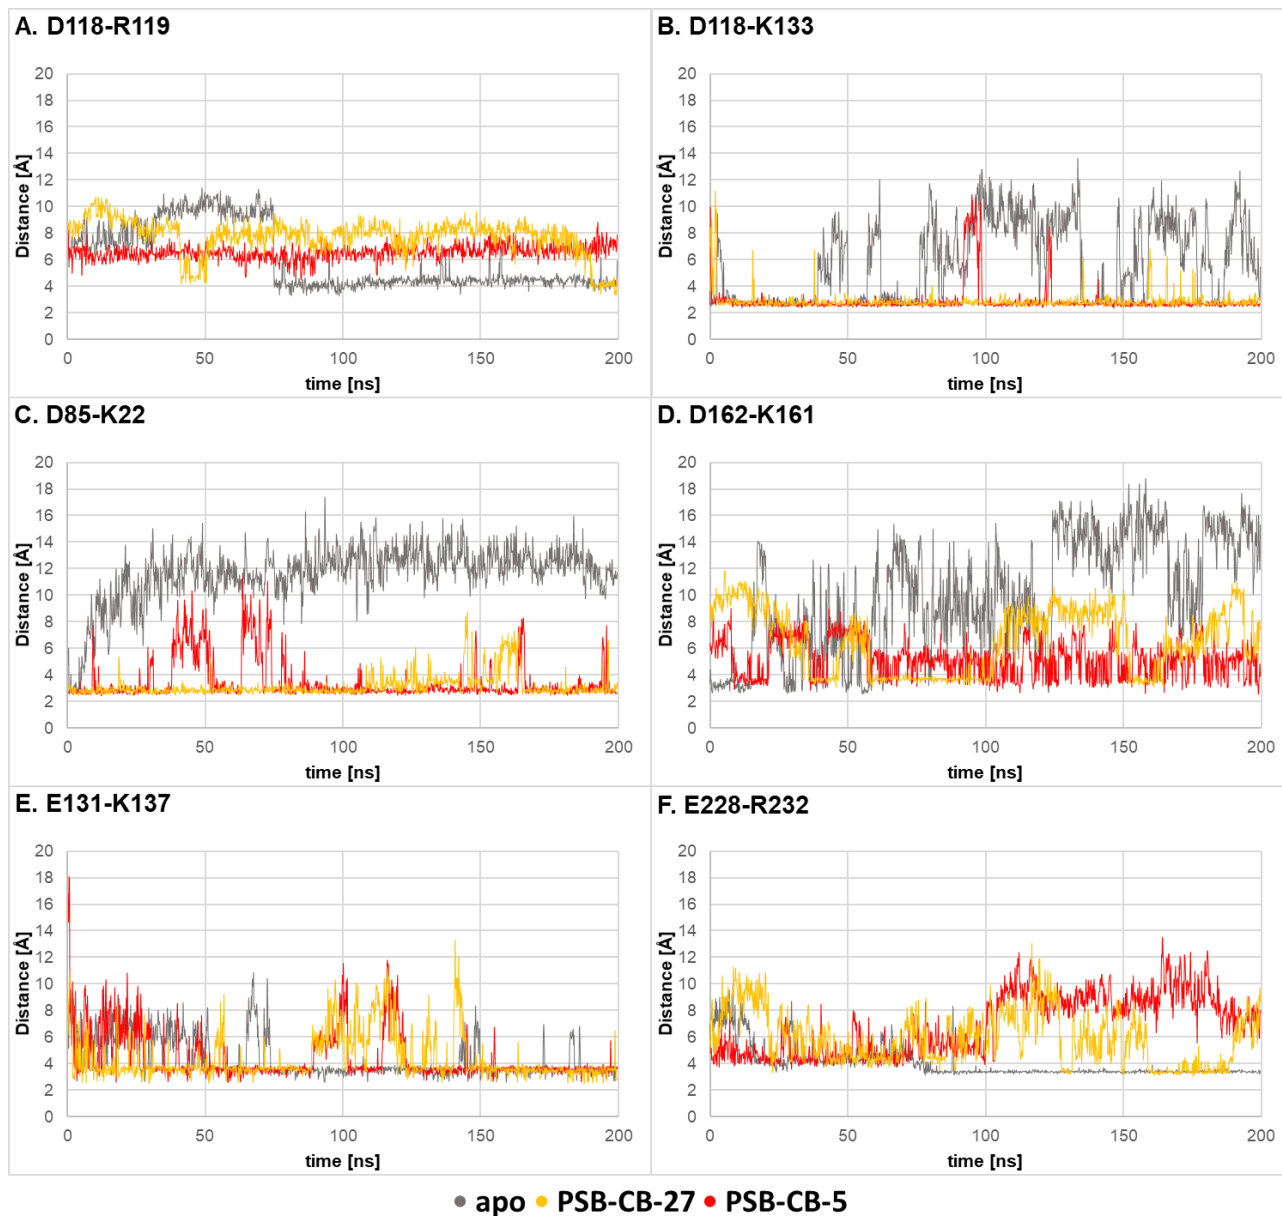

Figure S4. Trajectories of salt bridges during the 200 ns MD simulation runs.

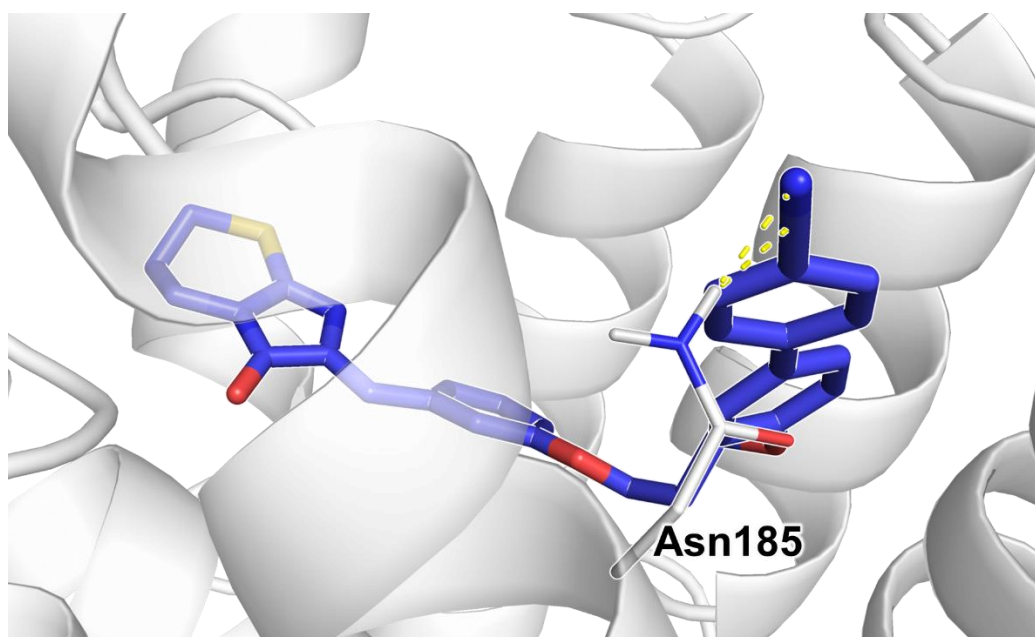

**Figure S5.** Possible interaction of antagonist 6 with a rotamer of Asn185.

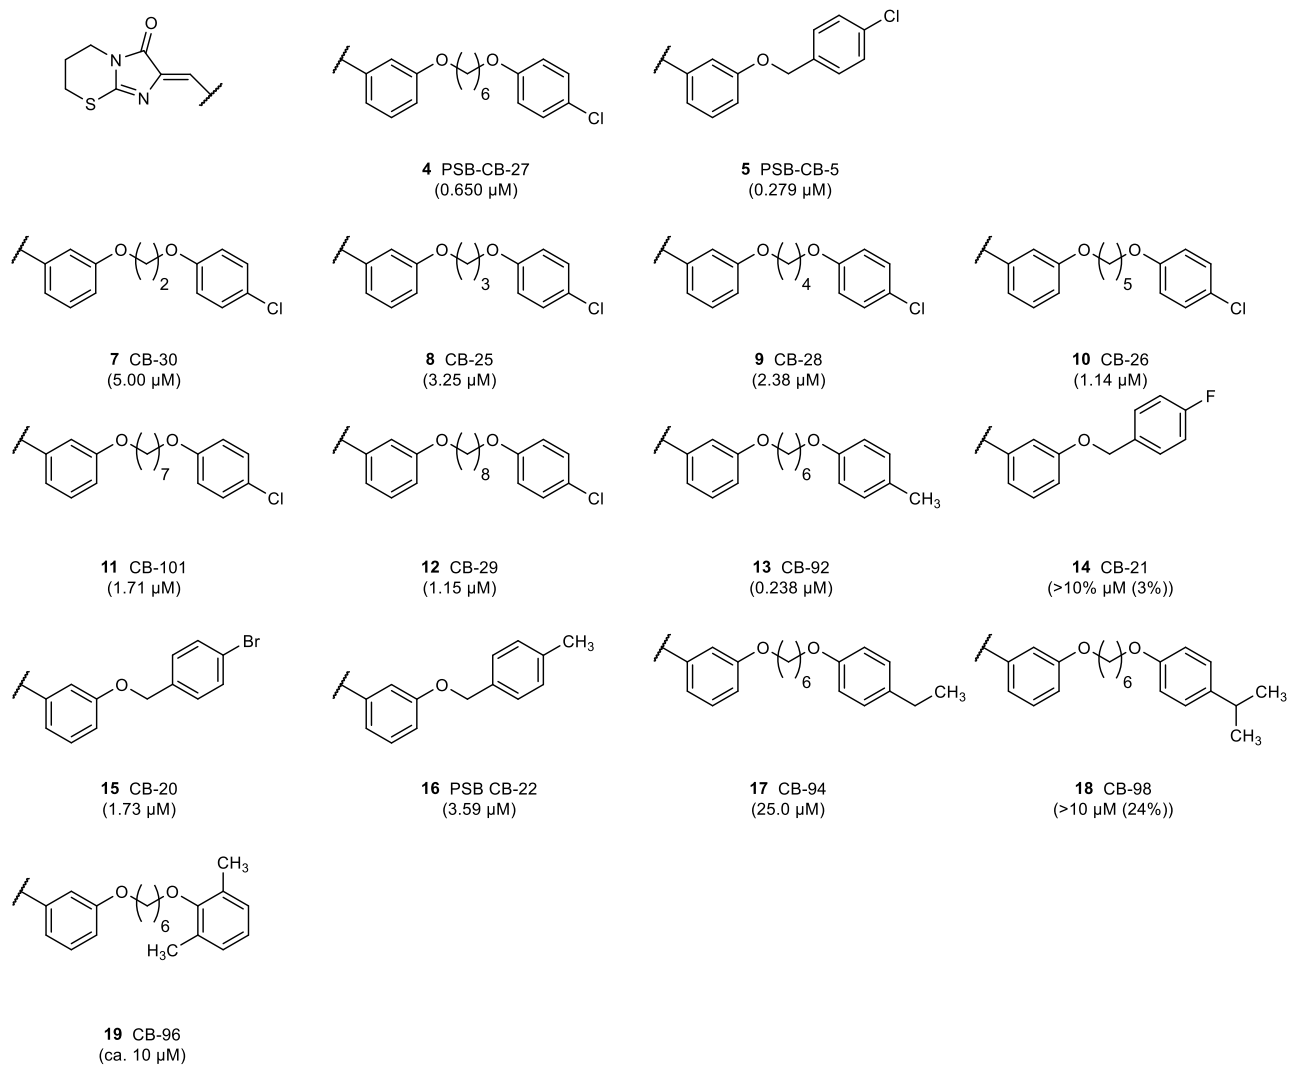

**Figure S6.** Structures of GPR18 imidazothiazinone antagonists with their respective  $\text{IC}_{50}$  values in brackets. For  $\text{IC}_{50}$  values > 10  $\mu\text{M}$  the percent inhibition of agonist-induced luminescence signal at 10  $\mu\text{M}$  is given. Biological results were taken from published studies [1].

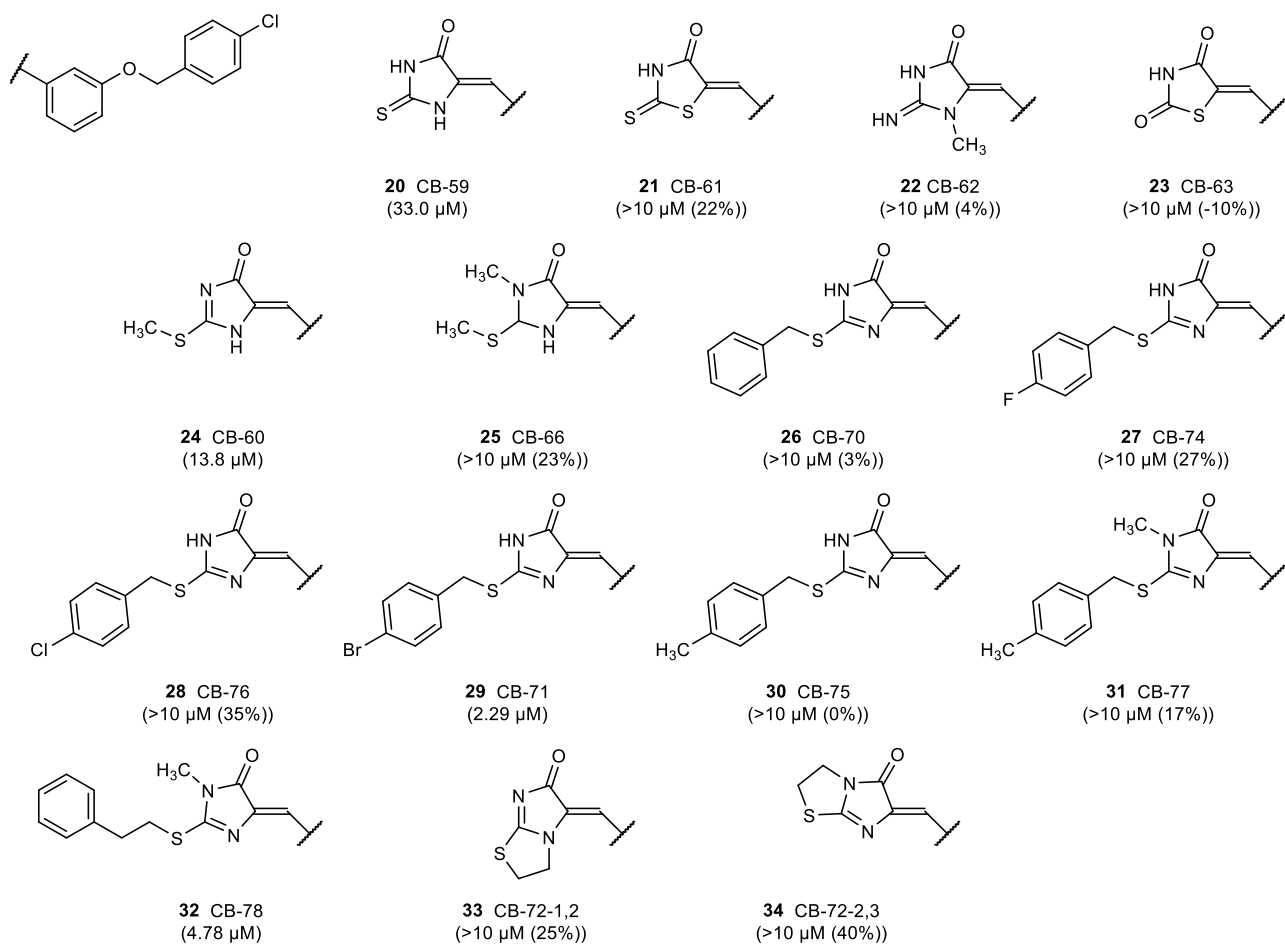

**Figure S7.** Structures of GPR18 antagonists with modification of the core structure with their respective IC<sub>50</sub> values in brackets. For IC<sub>50</sub> values > 10 μM the percent inhibition of agonist-induced luminescence signal at 10 μM is given. Biological results were taken from published studies [1].



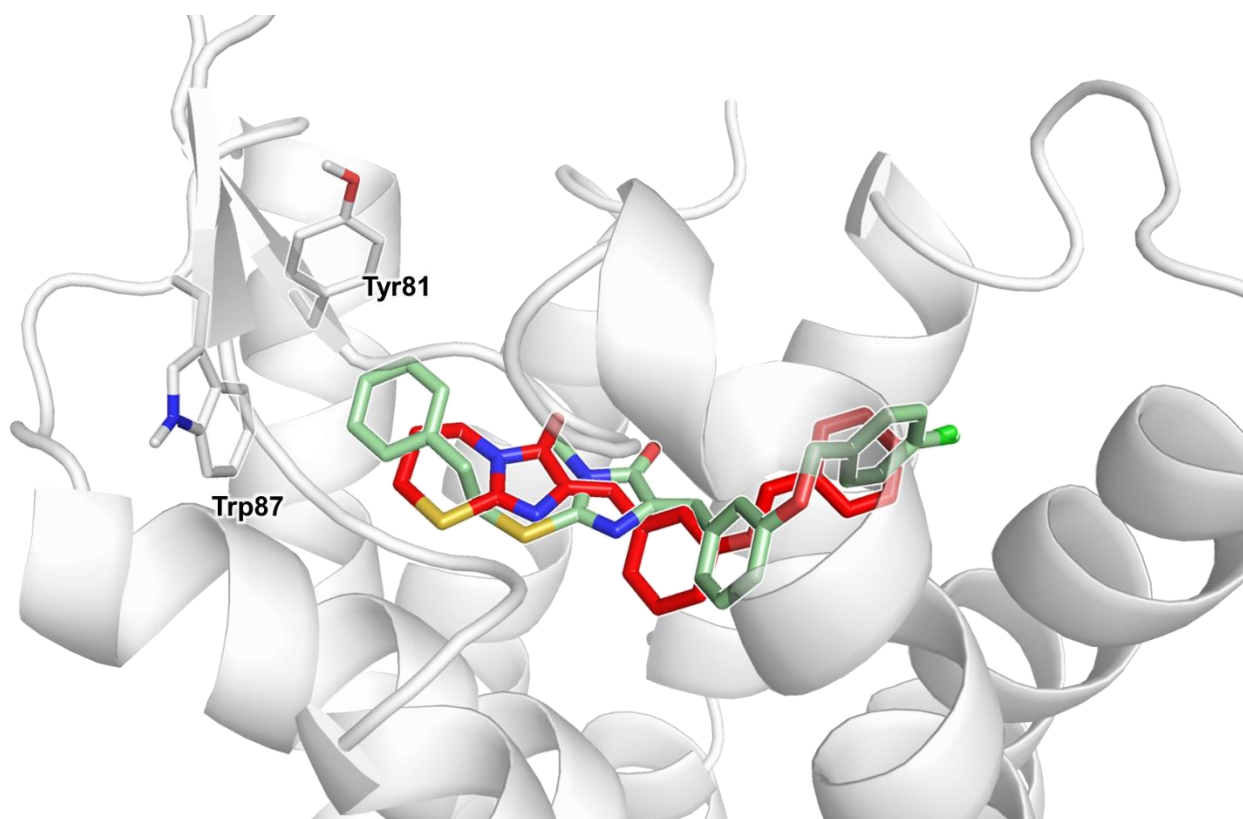

**Figure S8.** Comparison of the putative binding mode of antagonist 32 (green) and predicted binding mode of antagonist 5.

|                       |                                                               |     |
|-----------------------|---------------------------------------------------------------|-----|
| sp Q14330 GPR18_HUMAN | -----                                                         | 0   |
| sp P21554 CNR1_HUMAN  | MKSILDGLADTTFRITITDLDLYVGSNDIQYEDIKGDMSKLGYPQKFLTSFRGSPFQE    | 60  |
| sp P34972 CNR2_HUMAN  | -----                                                         | 0   |
|                       | <b>TM I</b>                                                   |     |
| sp Q14330 GPR18_HUMAN | MITLNNQDQVPVFN-----SHPDEYKIA                                  | 24  |
| sp P21554 CNR1_HUMAN  | KMTAGDNPQLVPADQVNITEFYNKSLSSFKENEENIQCGENFMDIECFMVLNPSQQLAIA  | 120 |
| sp P34972 CNR2_HUMAN  | -----MEECWVT-----EIANGSKDGLDSNPMKDYMILSGPQKTAVA37             |     |
|                       | . : : *                                                       |     |
|                       | <b>TM II</b>                                                  |     |
| sp Q14330 GPR18_HUMAN | ALVFYSCIFIIGLFVNIT---ALWVFSCTTK-KRTVTIYMMNVALVDLI---IMTFL     | 75  |
| sp P21554 CNR1_HUMAN  | VL-----SLTLGTFVLENLLVLCVILHSRSLRCRPSYHFIGSLAVADLLGSVIFVYSEFI  | 175 |
| sp P34972 CNR2_HUMAN  | VL-----CTLLGLLSALENVAVLYLILSSHQLRRKPSYLFIGSLAGADFLASVVFACSEV  | 92  |
|                       | . * : * : : . * : : : . : : : : * * : : * : : *               |     |
|                       | <b>TM III</b>                                                 |     |
| sp Q14330 GPR18_HUMAN | PRRMFYAKDEWPFGEYFCQIIGAIT-VFYPSIALWLLAFISADRYMAIVQPKYAKELKN   | 134 |
| sp P21554 CNR1_HUMAN  | DRHVFHR-KDS---RNVFLFKLGGVTASFTASVGS--LFLTAIDRYISIHRLPLAYKRIVT | 229 |
| sp P34972 CNR2_HUMAN  | NHVFHFG-VDS---KAVFLKLGSMTMTFTASVGS--LLTAIDRYLCLRYPPSYKALLT    | 146 |
|                       | * : : * : * . * : : * * * * * : : * * * : : * * * : :         |     |
|                       | <b>TM IV</b> <span style="float: right;"><b>TM V</b></span>   |     |
| sp Q14330 GPR18_HUMAN | TCKAVLACVGVWIMTLTTTTPLLLLYKDPDKDSTPATCLKIEDIYKAVNVLNLTFLTF    | 194 |
| sp P21554 CNR1_HUMAN  | RPKAVVAFCLMWTIAIVIAVPLLLGWNCEK---LQSVCSDIIPHI-----DETYIIMF    | 278 |
| sp P34972 CNR2_HUMAN  | RGRALVTLGIMWVLSALVSYLPLMGWTCCP----RPCSELEPLI-----PNDYLLS      | 193 |
|                       | : * : : : * : : : : * : : : * : : * : *                       |     |
| sp Q14330 GPR18_HUMAN | FFLIPLFIMIG---CYLV-----I IHNLLHGRTSKLKPVKKEKS                 | 230 |
| sp P21554 CNR1_HUMAN  | WIGVTSVLLLFIVYAYMYILWKAHSHAVRMIQRGTQKSI I IHTSEDGKQVTRPDQARM  | 338 |
| sp P34972 CNR2_HUMAN  | WLLFIAFLFSGI IYTYGHVLWKAHQHVASLSGH-----QDRQVPGMARMRLD         | 240 |
|                       | : : . . : : *                                                 |     |
|                       | <b>TM VI</b> <span style="float: right;"><b>TM VII</b></span> |     |
| sp Q14330 GPR18_HUMAN | IR---I IITLLVQVLVCFMPEHICFAFLMLGTGENSYNPWLAFTTFLMNLSTCLDVILYY | 287 |
| sp P21554 CNR1_HUMAN  | IRLAKTLVLILVLIICWGPILAIMVYDVFVKMNKLIKTVAFCSMLCLLNSTVNPIIYA    | 398 |
| sp P34972 CNR2_HUMAN  | VRLAKTLGLVLAVLLICWFPVLAALAHSLATTLSDQVKKAFCSMLCLINSMVNPVIYA    | 300 |
|                       | : * : : * : : * : * : * : : * * : : * : : : * *               |     |
| sp Q14330 GPR18_HUMAN | IVSKQFQARVISVMLYRNYLRSMRKSFRSGSLRSLSNINSEML-----              | 331 |
| sp P21554 CNR1_HUMAN  | LRSKDLRHAFRSMFP--SC-----EGTAQPLDNMMDG---SDCLHKHANN---         | 438 |
| sp P34972 CNR2_HUMAN  | LRSGEIRSSAHHCLA--HW-----KCVRGLGSEAKEEAPRSVTEADGKITP           | 348 |
|                       | : * : : : : * : : :                                           |     |
| sp Q14330 GPR18_HUMAN | ----- 331                                                     |     |
| sp P21554 CNR1_HUMAN  | -AASVHRAAESCISKSTVKIAKVTMSVSTDTSAEAL 472                      |     |
| sp P34972 CNR2_HUMAN  | WPDSRDLDLSDC----- 360                                         |     |

**Figure S9.** Multiple sequence alignment of human GPR18 and the cannabinoid receptors CB<sub>1</sub> and CB<sub>2</sub>. Residue positions involved in the binding of cannabinoid agonists in the X-ray crystal structure of CB<sub>1</sub> receptor are highlighted.

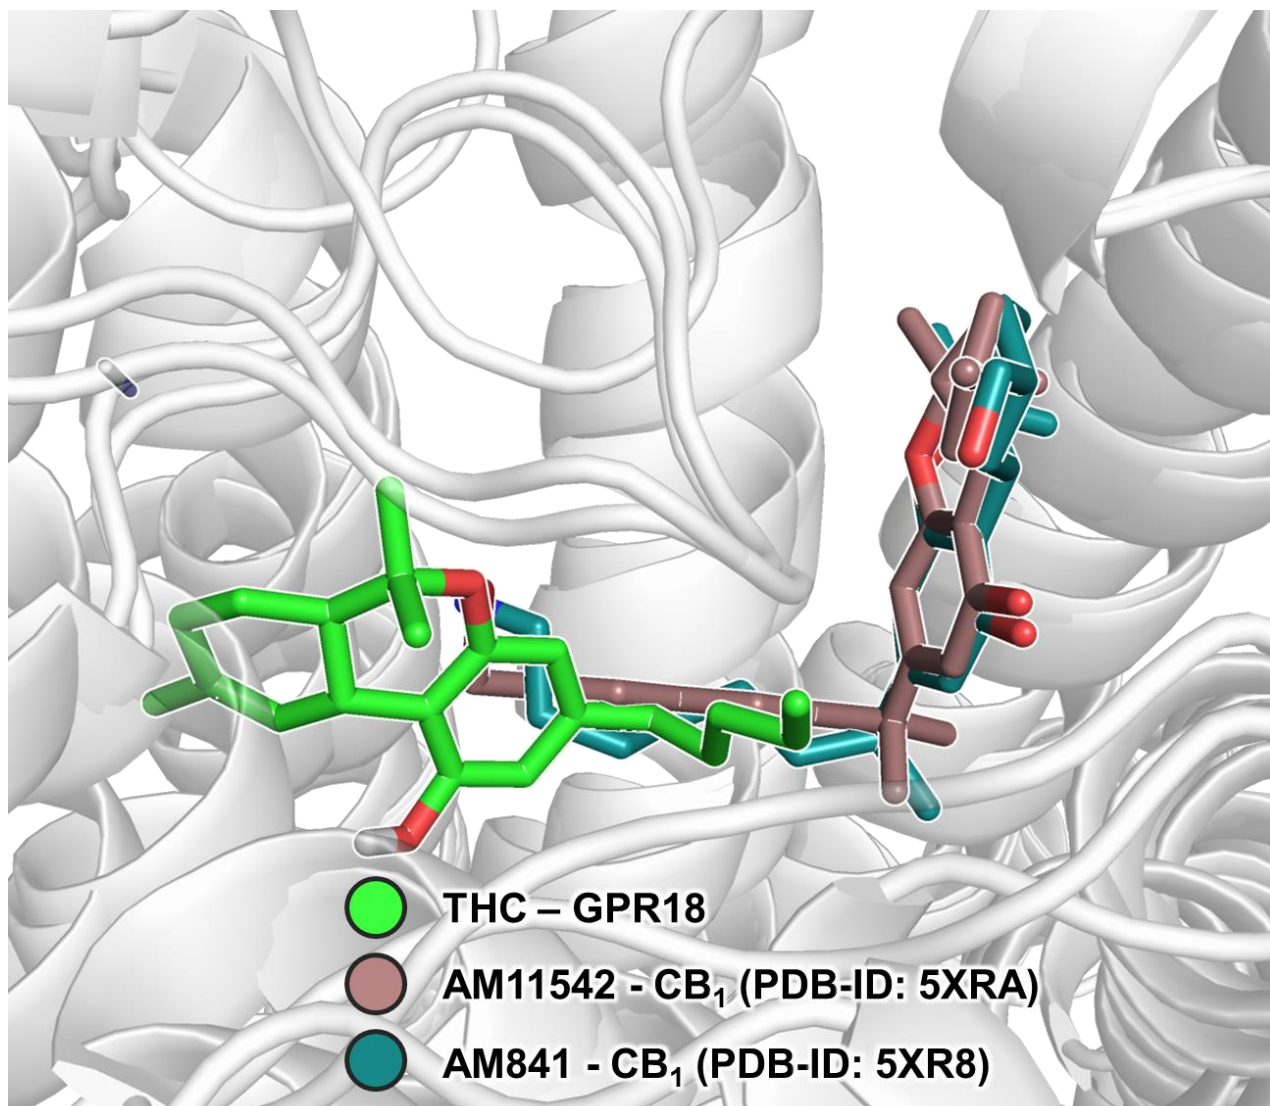

**Figure S10.** Comparison of the proposed binding mode of THC to GPR18 with the binding of THC derivatives to the CB<sub>1</sub> receptor as observed in the crystal structure [2].

## References

1. Schoeder, C. T.; Kaleta, M.; Mahardhika, A. B.; Olejarz-Maciej, A.; Łażewska, D.; Kieć-Kononowicz, K.; Müller, C. E. Structure-activity relationships of imidazothiazinones and analogs as antagonists of the cannabinoid-activated orphan G protein-coupled receptor GPR18. *Eur. J. Med. Chem.* **2018**, *155*, 381–397.
2. Hua, T.; Vemuri, K.; Nikas, S. P.; Laprairie, R. B.; Wu, Y.; Qu, L.; Pu, M.; Korde, A.; Jiang, S.; Ho, J.-H.; *et al.* Crystal structures of agonist-bound human cannabinoid receptor CB1. *Nature* **2017**, *547*, 468–471.
